# Supplementary material for: High-Throughput Functional Evaluation of MAP2K1 Variants in Cancer
Source: Oxford University Press journal article supplement (doi:10.1158/1535-7163.mct-22-0302), 2022-11-28
Supplement: mct-22-0302_supplementary_figures_suppsf.docx [file mct-22-0302_supplementary_figures_suppsf.docx]

**Supplementary Data**

**High-throughput functional evaluation of *MAP2K1* variants in cancer**

**Contents:**

**Supplementary Figure 1-17**

**
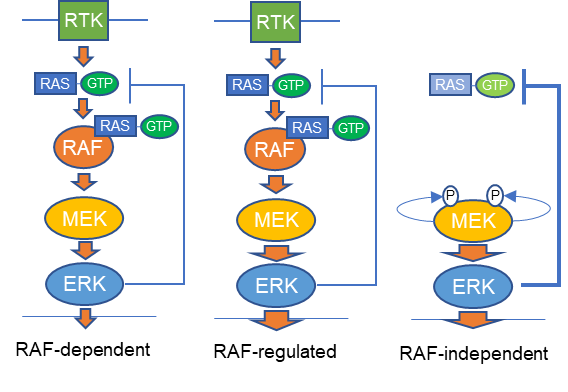
**

**Supplementary Figure S1: Functional classed of MEK mutations**

Schemas show physiologic MAPK pathway signaling in cells with MAP2K1 mutants. RAF-dependent mutants increase ERK activation only in a situation with active RAF. RAF-regulated MAP2K1 mutants likely exhibit independent kinase activity, but this activity can be activated by activated RAF to augment signaling. RAF-independent MAP2K1 mutants strongly activate ERK and induce negative feedback to upstream signaling by autophosphorylation.


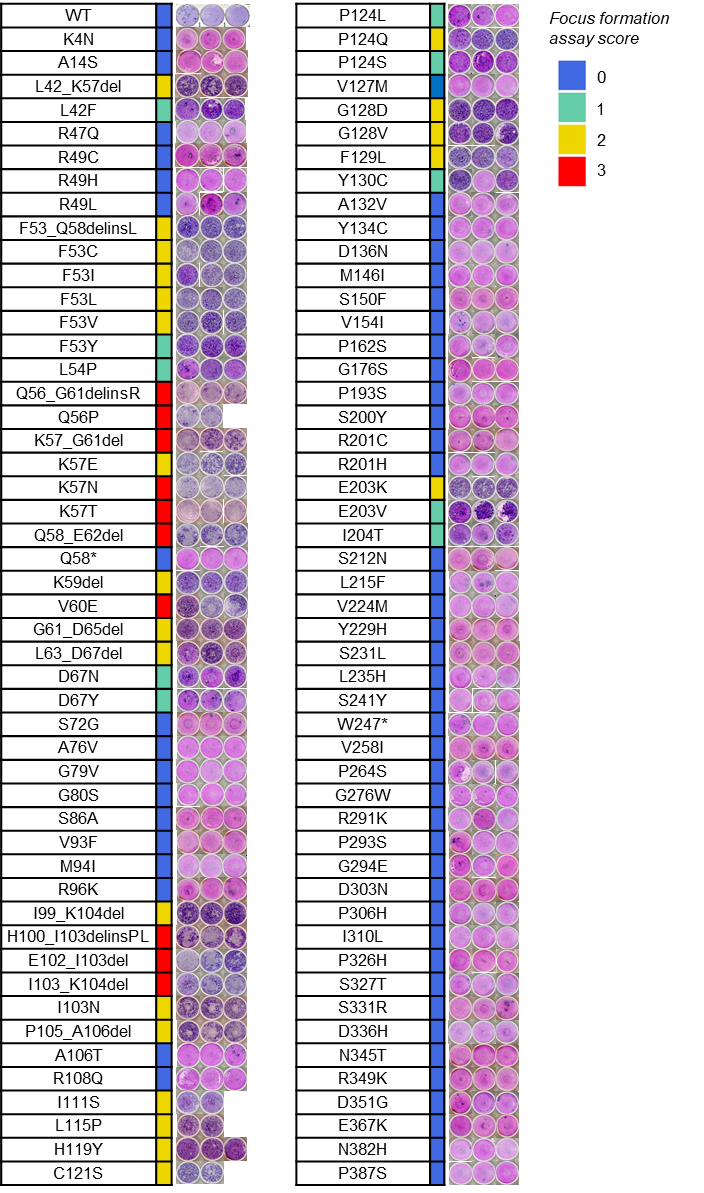


**Supplementary Figure S2: Representative images of the focus formation assay in 3T3 cells**

These images show 3T3 cells stained with Giemsa stain after the focus formation assay. Each variant with 3 different barcodes was prepared in biological triplicate and technical duplicate assays. The color of the columns on the right indicates the focus formation scoring. WT, wild-type.


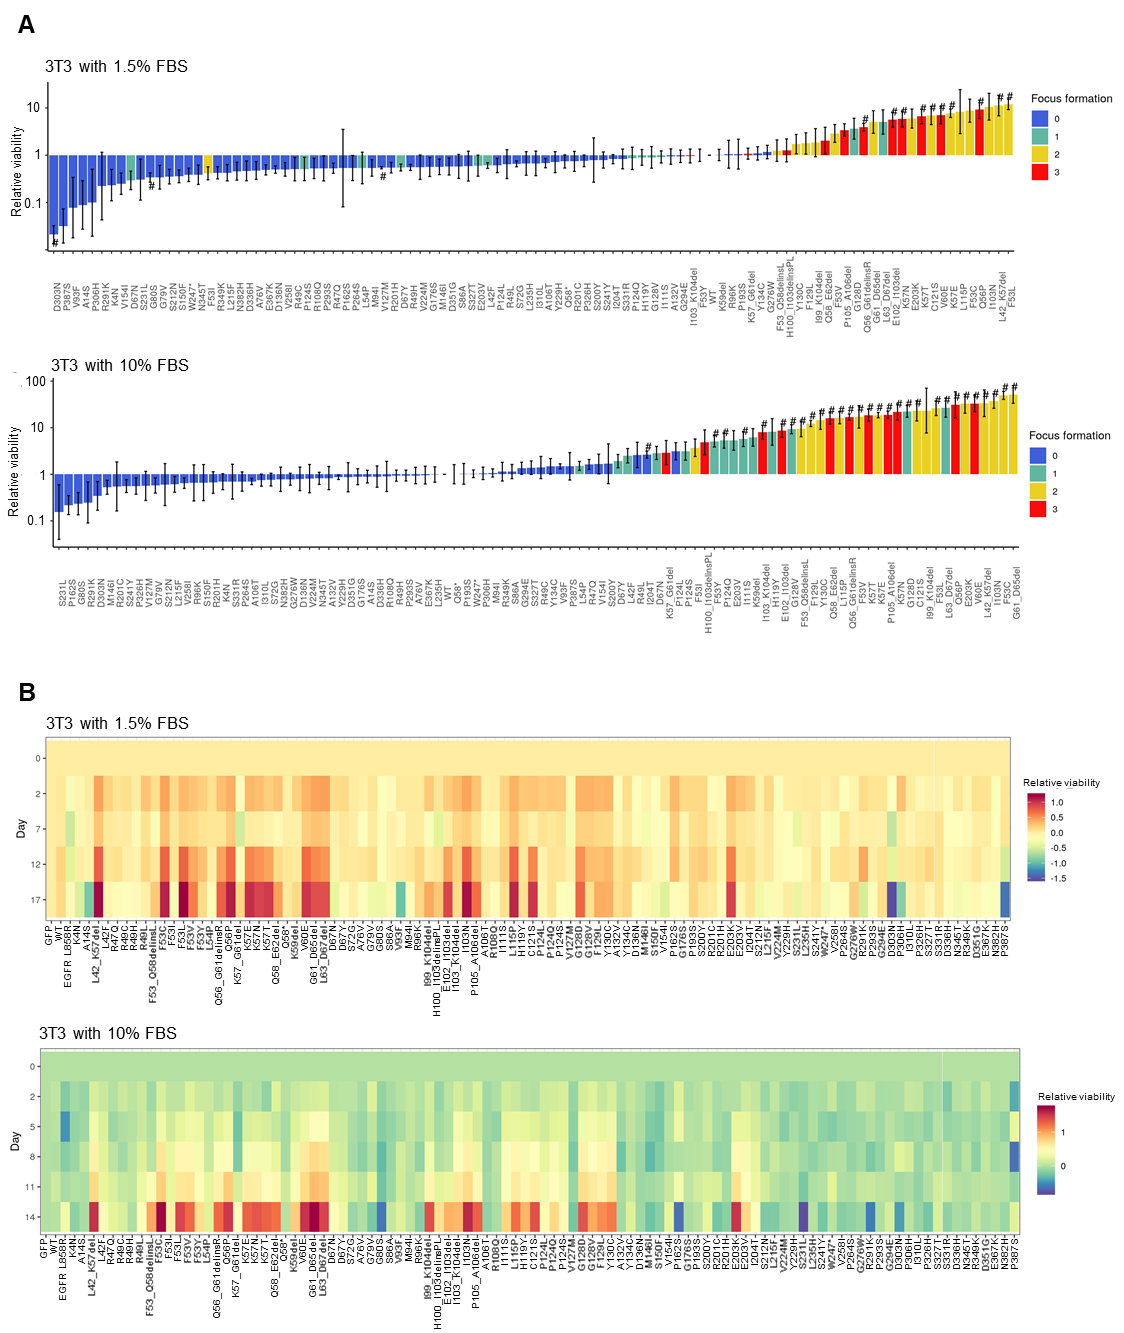


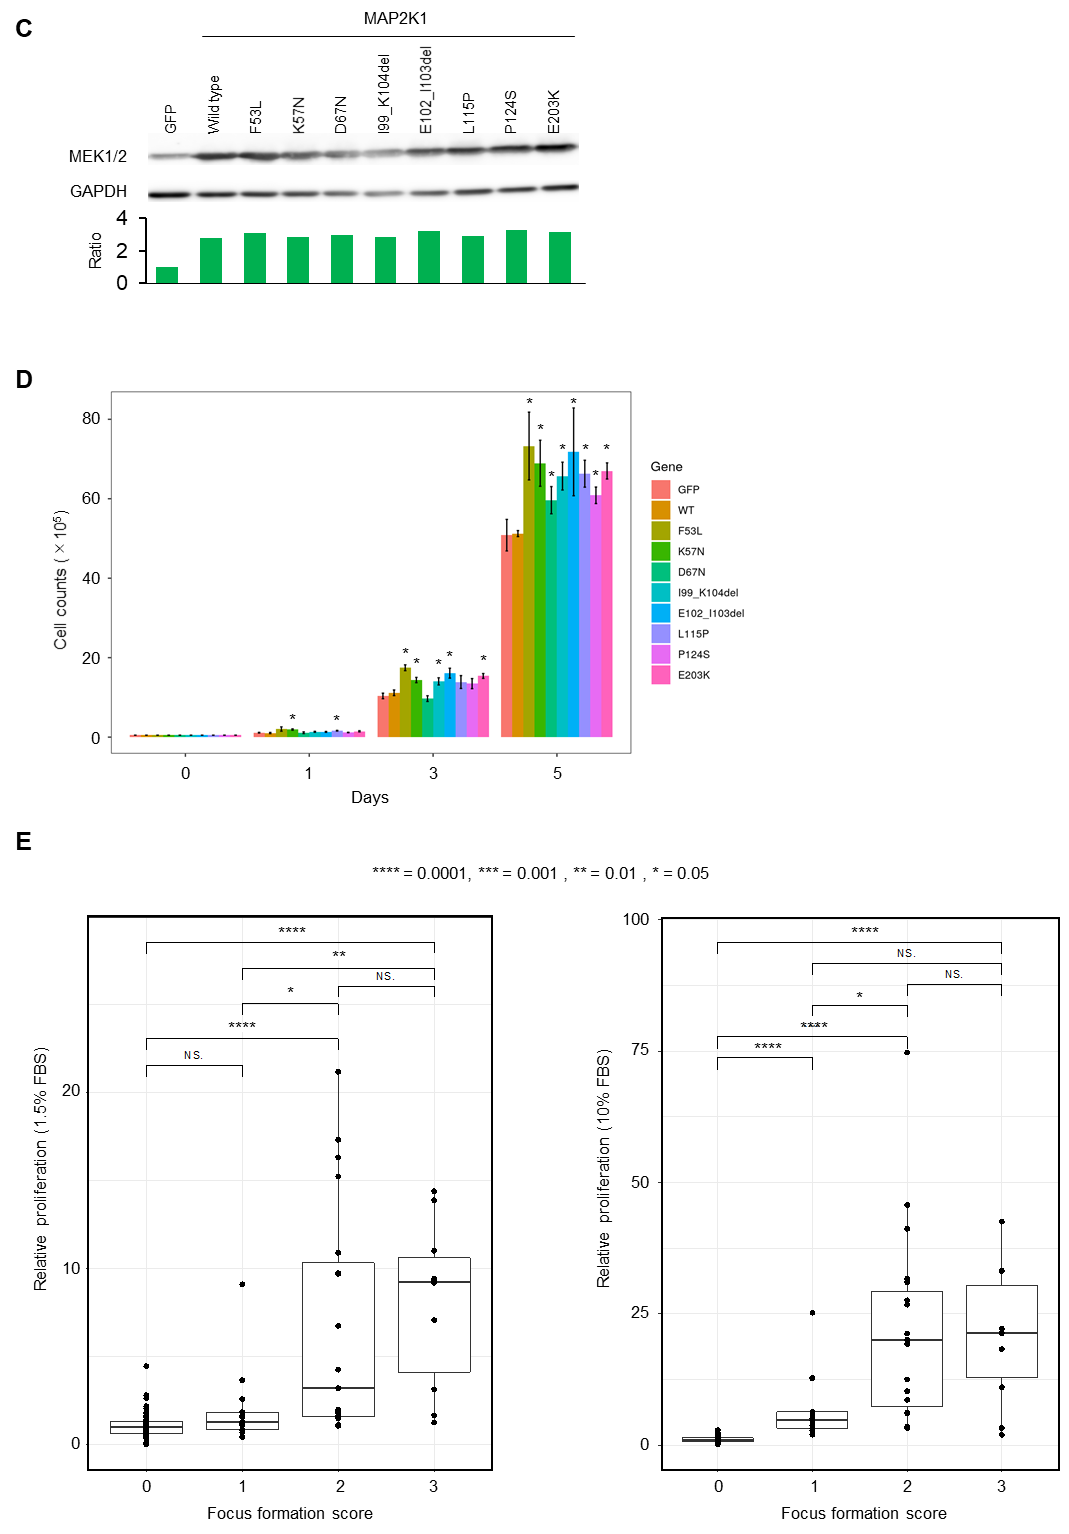


**Supplementary Figure S3: Growth advantage of *MAP2K1* variants sorted in ascending order of proliferating mutations**

**A,** The relative proliferation shown in Figure 2A is sorted in ascending order of proliferating mutations. **B,** Chronological change of 3T3 cells with MAP2K1 variants. 3T3 cells expressing various MAP2K1 variants were mixed and cultured in DMEM-F12 with 1.5% FBS for 17 days or 10% FBS for 14 days. The relative proliferation was evaluated every 3 to 5 days as the fold-change in the ratio of the barcode number of MAP2K1 variants relative to day 0, which is also compensated by the value of MAP2K1 WT. The values are shown in a logarithmic scale. WT, wild-type. **C,** Assessment of protein expression of MAP2K1 variants by western blotting. The whole-cell lysates of A375 cells with MAP2K1 variants or GFP were analyzed by western blot analysis using antibodies against MEK1/2 and GAPDH. The ratio of MEK1/2 to GAPDH is shown as a bar graph. **D,** MAP2K1 variant function in 293T cells. Several variants were introduced into 293T cells and 5.0×104 cells were seeded at day 0 to evaluate the cell growth at day 1, 3 and 5 (**p* < 0.05 to WT by paired t test). **E,** Correlation between cell proliferation assay and focus formation assay. The Kruskal-Wallis test was used to analyze the overall group differences. The Steel-Dwass test was used as a post-hoc test for between-group differences in cell proliferation rates.


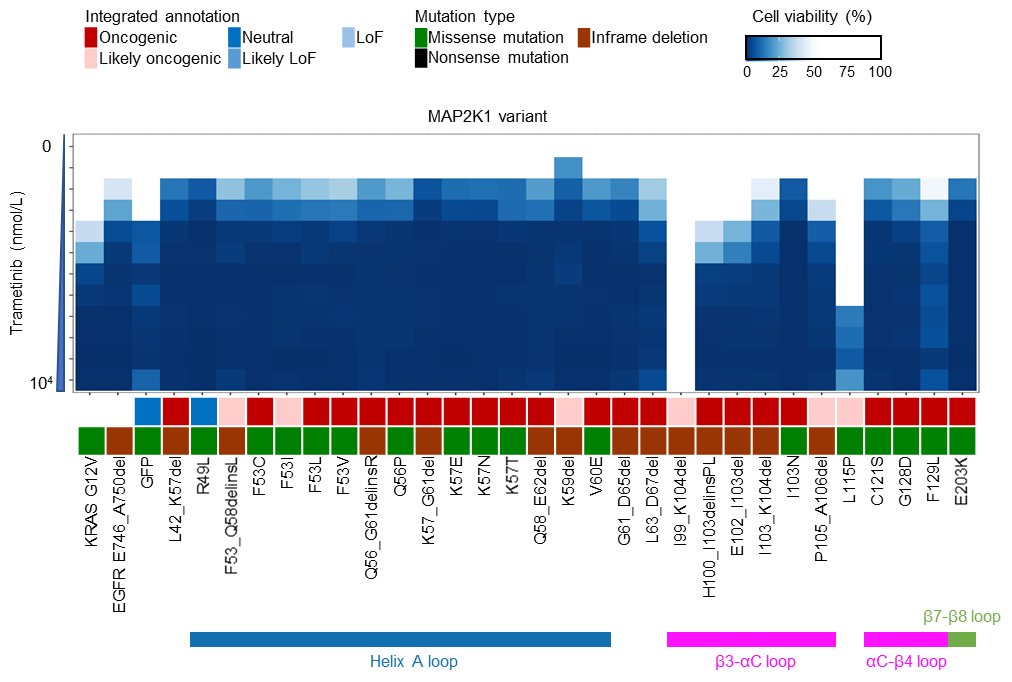


**Supplementary Figure S4: The sensitivity of MAP2K1 variants to MEK inhibitor in MANO method in 3T3**

3T3 cells with MAP2K1 variants and GFP were treated with DMSO or MEK inhibitors (trametinib) at the indicated concentrations, and the MEK inhibitors were varied by 12 steps (0 to 10,000 nM). Data are presented as mean ± SD (n = 3)


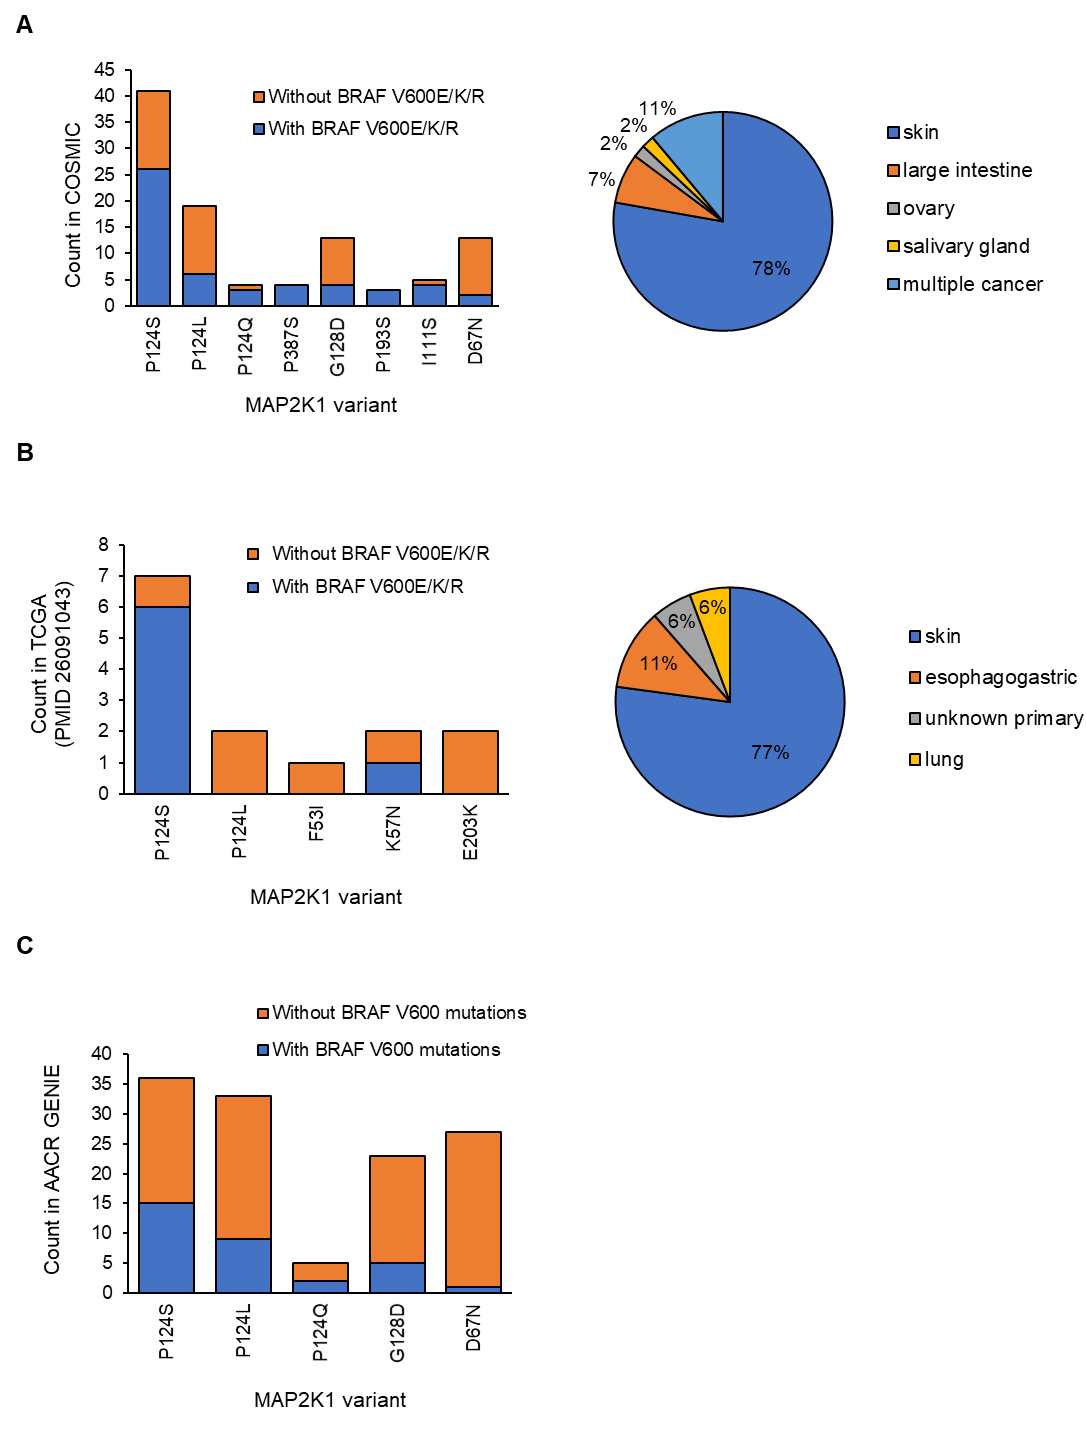


**Supplementary Figure S5: Concurrent mutation with BRAF** **V600E/K/R mutation in the COSMIC database**

Number of tumor samples with co-mutations of BRAF V600E/K/R with MAP2K1 in database. Blue and orange bars indicate co-mutation and simple mutation, respectively. The circle charts show the percentage of the tissue-specific distribution of recurrent (n ≥ 2) co-mutation between *BRAF* and *MAP2K1* mutations selected. **A,** COSMIC database. **B,** TCGA study (63). **C,** AACR GENIE.


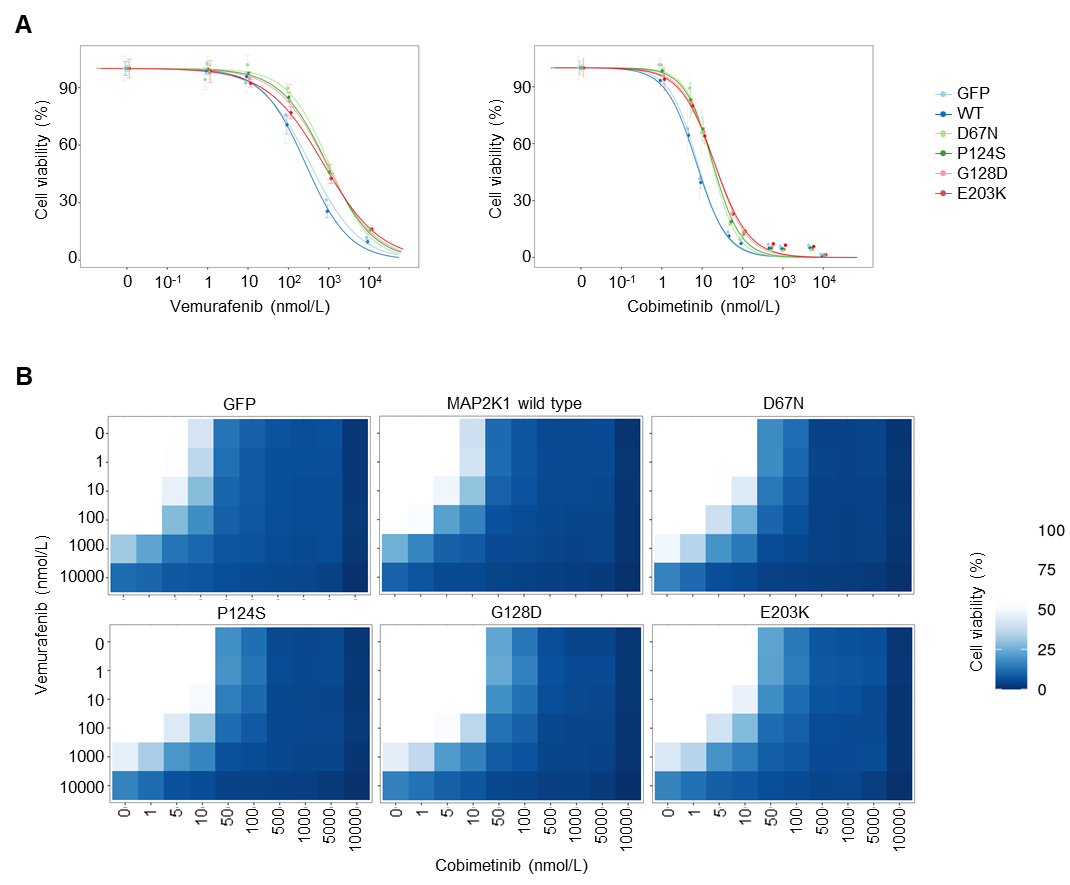


**Supplementary Figure S6: The individual sensitivity of MAP2K1 variants to combination therapy of BRAF and MEK inhibitor in HT-29 cell line.**

**A,** HT-29 cells transduced with 4 MAP2K1 variants, wild-type, and GFP were treated with DMSO, BRAF inhibitor (vemurafenib, right), or MEK inhibitors (cobimetinib, left) at the indicated concentrations for 5 days. Cell viability was measured using the PrestoBlue cell viability assay. The relative viability of the treated cells was measured in comparison with drug-free treatment. Data were plotted as mean ± SD (n = 3). **B,** Results of the cell viability assay using combination treatment with two drugs (vemurafenib and cobimetinib) at different concentrations for each individual variant color shading heat-map.


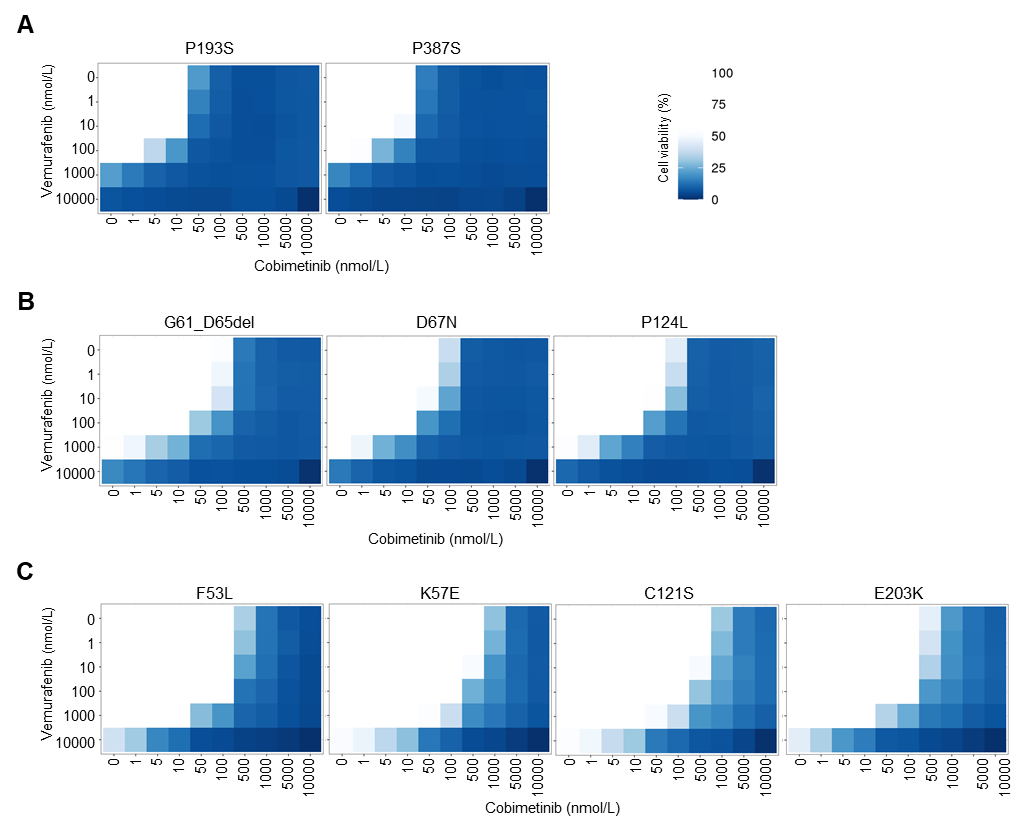


**Supplementary Figure S7: The individual sensitivity of MAP2K1 variants to combination therapy with BRAF and MEK inhibitors in A375 cells (vemurafenib + cobimetinib)**

Color shading heat-map of the cell viability assay results for the remaining 18 mutants in Fig. 3B that are not listed in Fig. 3C–G. **A,** parental (GFP) and no function. **B,** RAF-dependent. **C,** RAF-regulated.

**Supplementary Figure S8: The individual sensitivity of MAP2K1 variants to combination therapy with BRAF and MEK inhibitors in A375 cells (dabrafenib + trametinib)**

**A,** A375 cells transduced with 16 variants, wild-type, GFP were treated with DMSO, BRAF inhibitor (dabrafenib, left) or MEK inhibitors (trametinib, right) for 5 days. The relative viability of the cells is illustrated using a color shading heat-map compared with drug-free treatment. Data were plotted as mean ±SD (n = 3). **B-F,** Results of the cell viability assay using combination treatment with two drugs at different concentrations for each individual variant color shading heat-map. **B,** parental (GFP) and no function. **C,** RAF-dependent. **D,** RAF-regulated. **E,** RAF-independent. **F,** others.


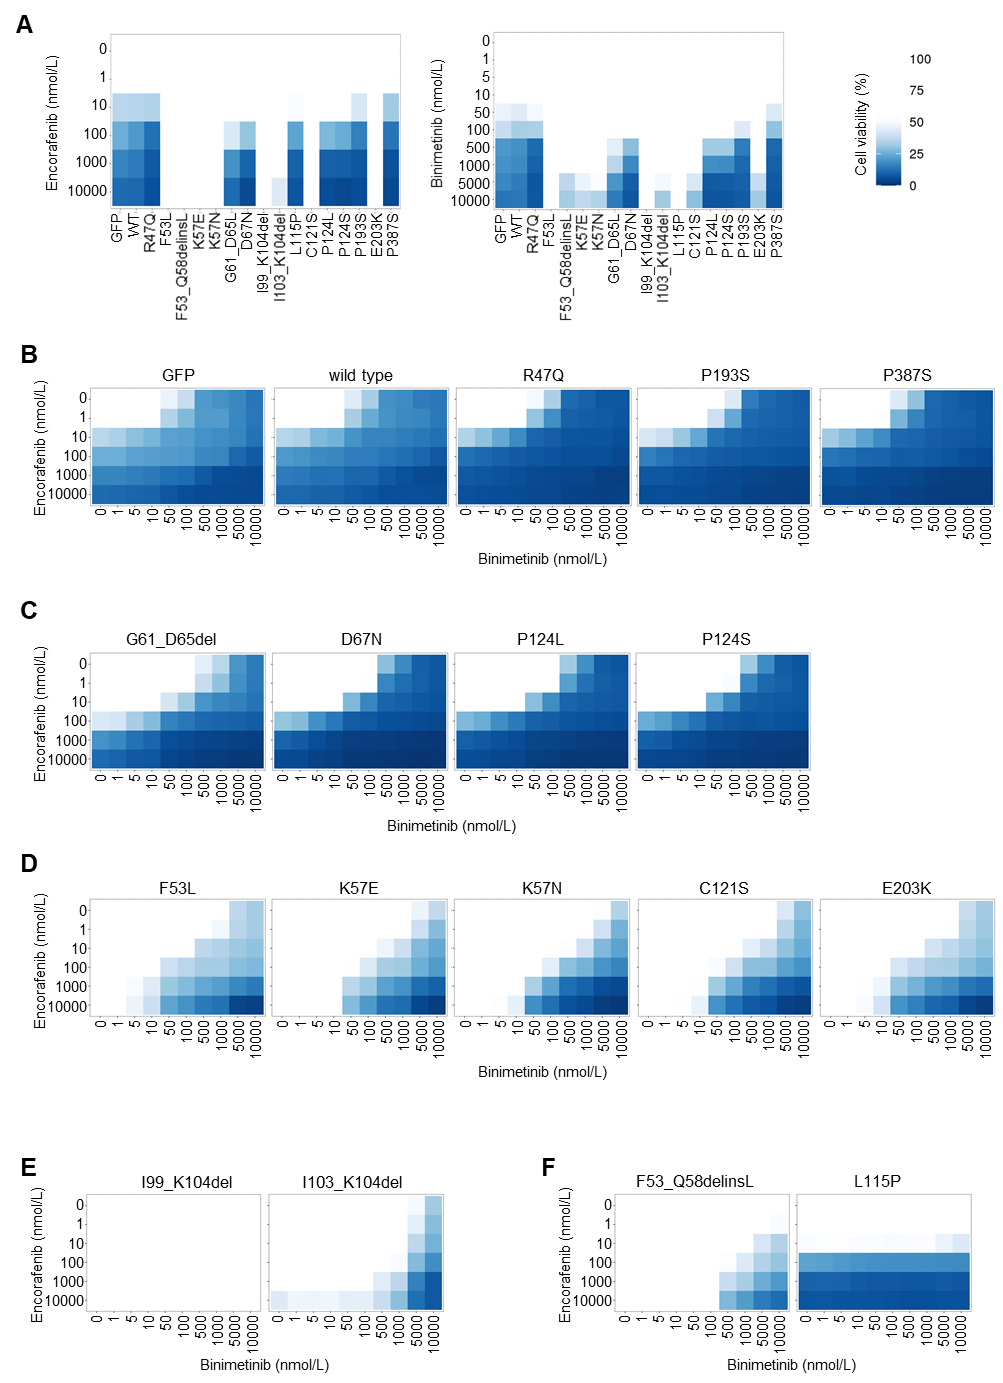


**Supplementary Figure S9: The individual sensitivity of MAP2K1 variants to combination therapy with BRAF and MEK inhibitors in A375 cells (encorafenib + binimetinib)**

**A,** A375 cells transduced with 16 variants, wild-type, GFP were treated with DMSO, BRAF inhibitor (encorafenib, left) or MEK inhibitors (binimetinib, right) for 5 days. The relative viability of the cells is illustrated using a color shading heat-map compared with drug-free treatment. Data are plotted as the mean ± SD (n = 3). **B-F,** Results of the cell viability assay using combination therapy of two drugs with different concentrations for each individual variant color shading heat-map. **B,** parental (GFP) and no function. **C,** RAF-dependent. **D,** RAF-regulated. **E,** RAF-independent. **F,** others.


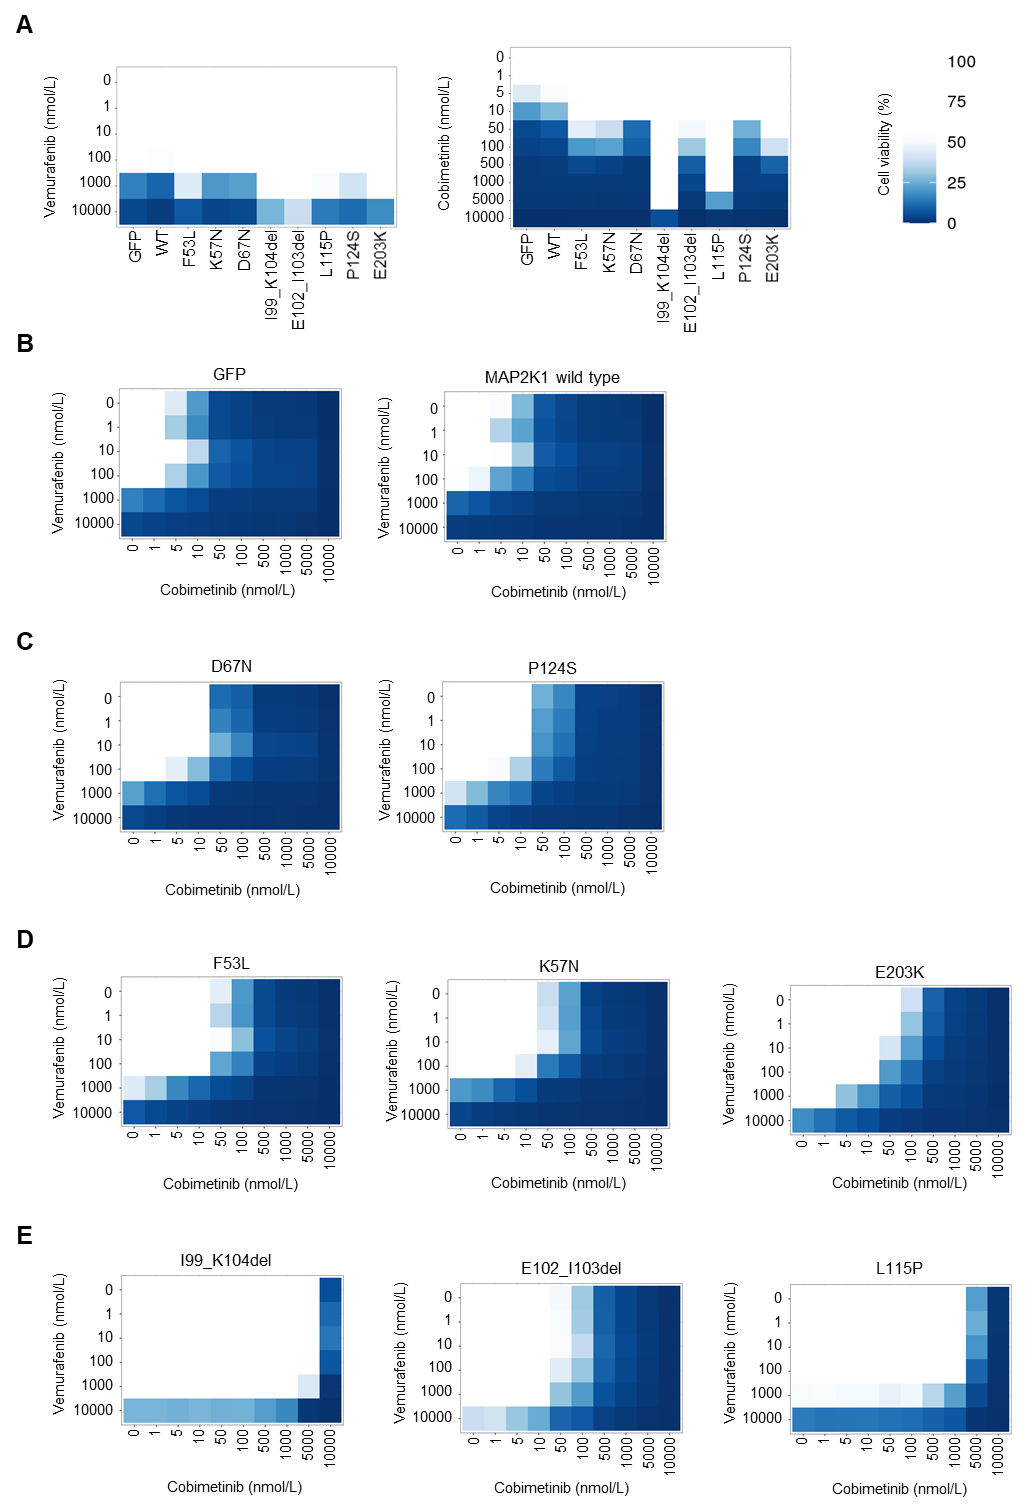


**Supplementary Figure S10: The individual sensitivity of MAP2K1 variants to combination therapy of BRAF and MEK inhibitor in HT-29 cells**

**A,** HT-29 cells transduced with 9 MAP2K1 variants and GFP were treated with DMSO, a BRAF inhibitor (vemurafenib, right) or a MEK inhibitor (cobimetinib, left) at the concentrations indicated for 5 days. Cell viability was measured using the PrestoBlue cell viability assay. The relative viability of the treated cells was measured and illustrated using color shading heat-map in comparison to drug-free treatment. Data were plotted as the mean ± SD (n = 3). **B-E,** Results of cell viability assay using combination treatment with two drugs at different concentrations for each individual variant color shading heat-map. **B,** parental (GFP) and no function. **C,** RAF-dependent. **D,** RAF-regulated. **E,** RAF-independent.


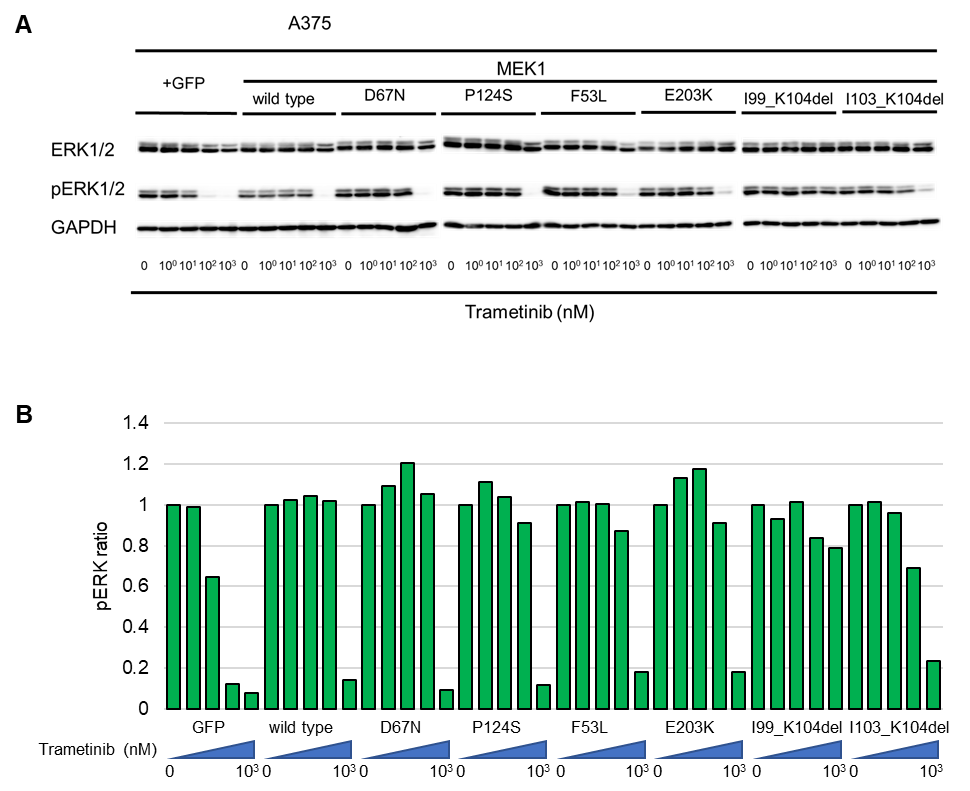


**Supplementary Figure S11: Inhibition of pERK phosphorylation by MEK inhibitor (trametinib) in A375 cells with MAP2K1 variants**

**A,** Inhibition of phosphorylation of pERK by trametinib. A375 cells with MAP2K1 variants were treated with trametinib for 4 h and whole-cell lysates were analyzed by western blot analysis using antibodies against p44/42 ERK1/2, phospho-p44/42 ERK (pERK) and GAPDH. **B,** the bands of pERK were quantified using Image J software (64) using the median of the intensity. Relative intensities were calculated in compared with drug-free treatment.


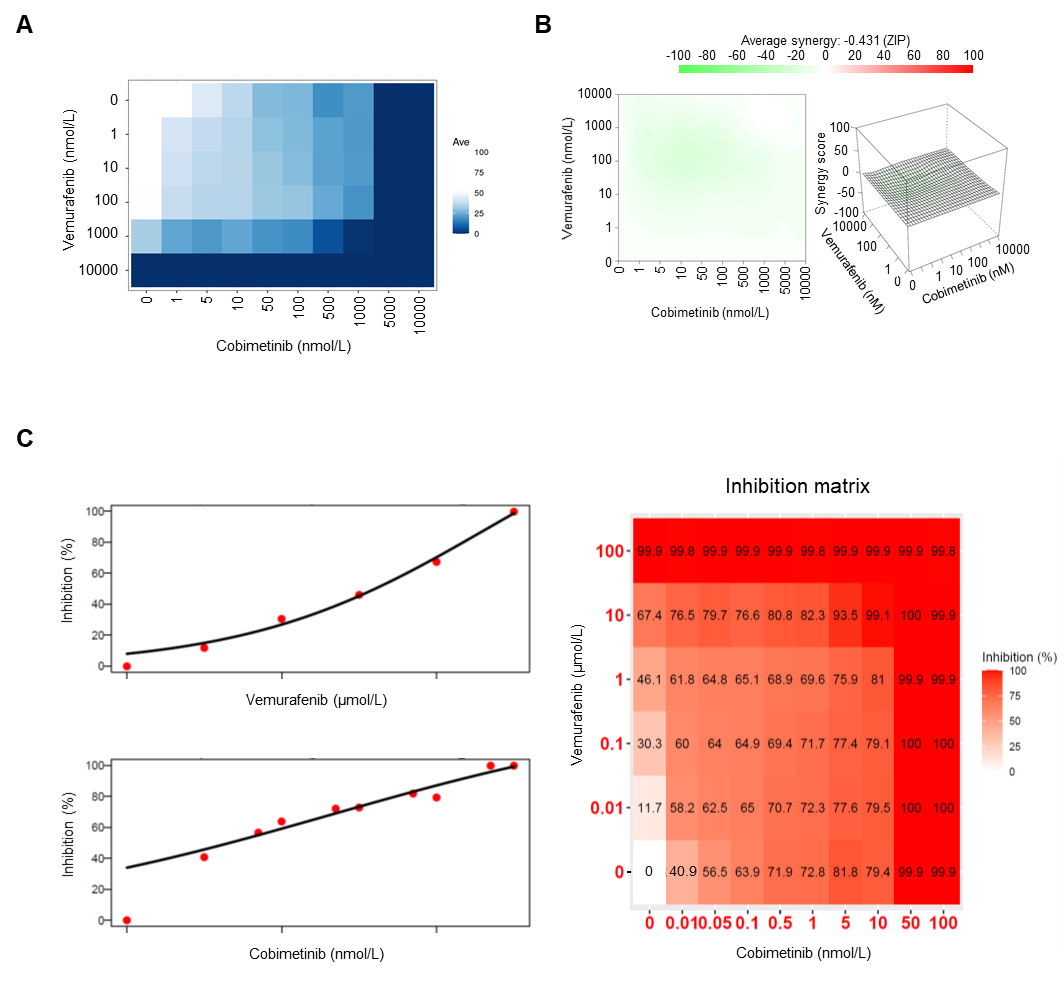


**Supplementary Figure S12: The sensitivity of A2058 cells to a combination therapy of BRAF and MEK inhibitor**

**A,** A2058 cell is a melanoma cell line harboring BRAF V600E and MAP2K1 P124S. The cells were treated with vemurafenib and cobimetinib at the concentrations indicated for 5 days. Cell viability was measured using the PrestoBlue cell viability assay. The relative viability of the treated cells was measured and illustrated using color shading heat-map in comparison to drug-free treatment. Data were plotted as the mean ± SD (n = 3). **B,** The synergistic effect of the combination therapy of vemurafenib and cobimetinib was calculated (Methods). Those with high synergy are highlighted in red in the 2D figure on the left and are highly represented in the 3D landscape on the right. **C,** Dose-response curves are shown for vemurafenib (left upper) and cobimetinib (left lower). Dose-response matrix for the inhibition ratio of the combination treatment is revealed with the actual ratio for the individual concentration.


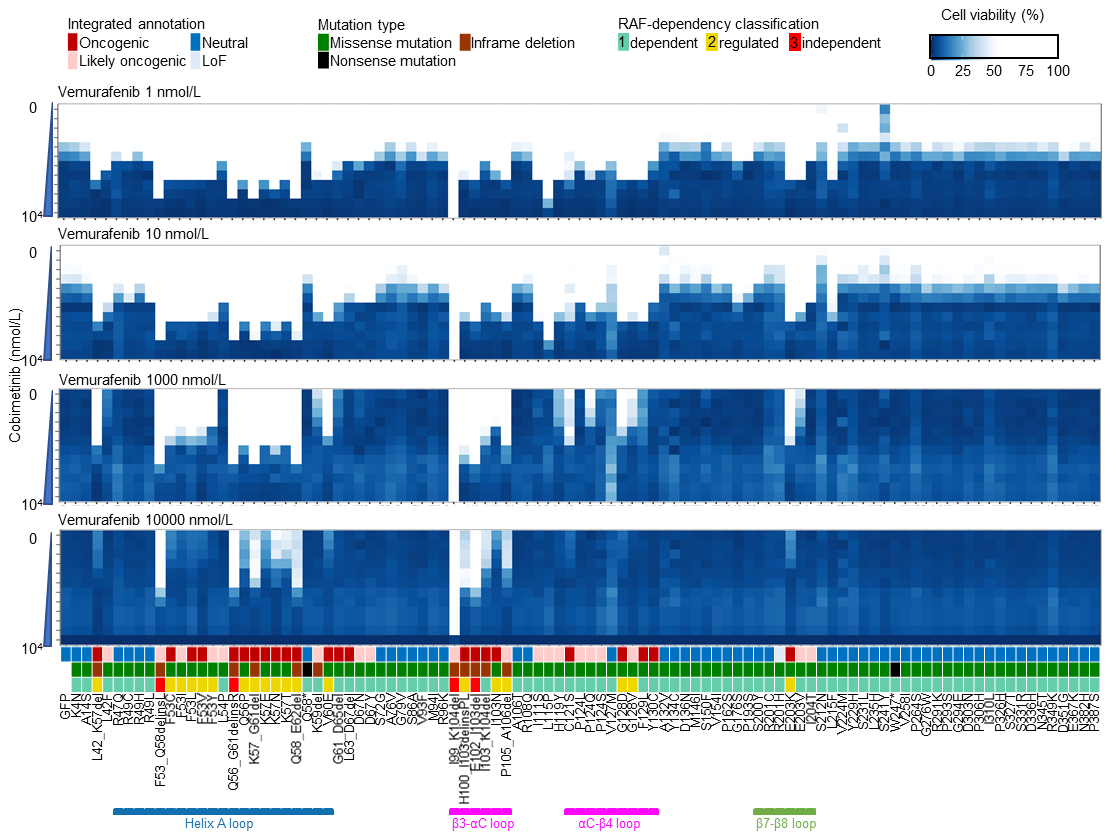


**Supplementary Figure S13: The sensitivity of MAP2K1 variants to BRAF and MEK inhibitor using the MANO method in A375 cells**

In relation to Figure 4A, the relative viability of treated cells with cobimetinib and vemurafenib (1 nM to 10,000 nM).


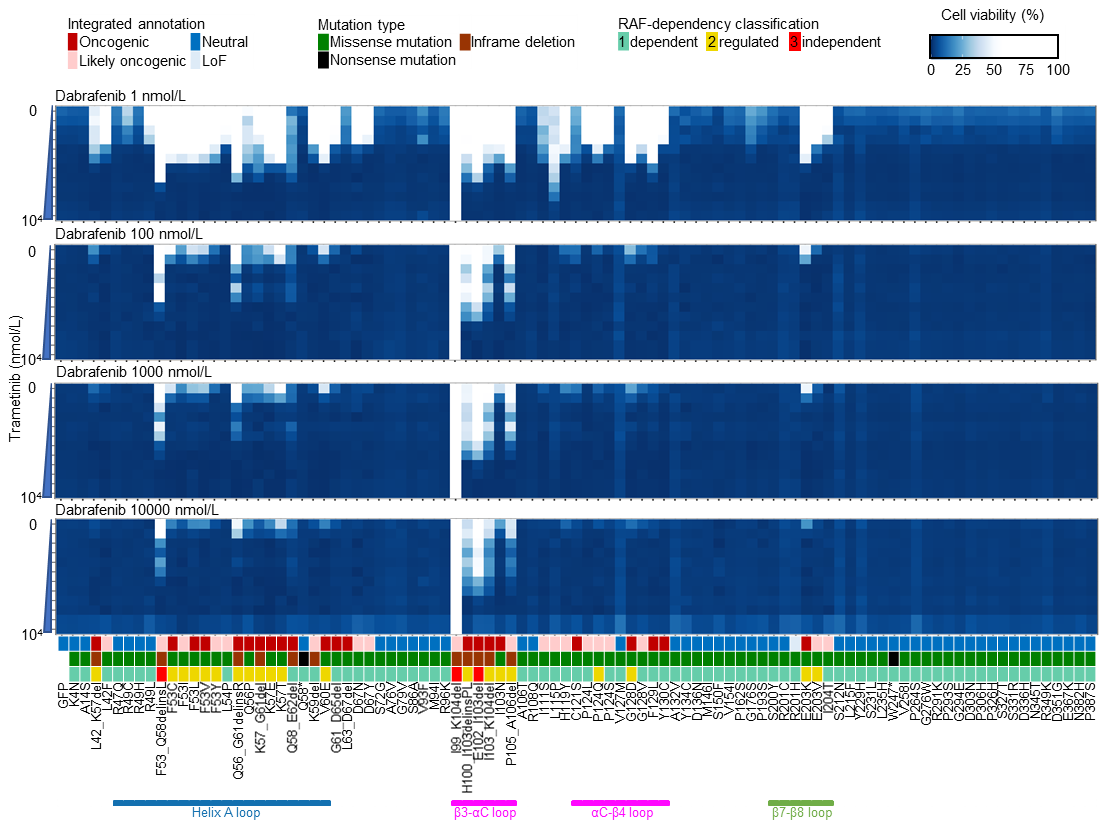


**Supplementary Figure S14: The sensitivity of MAP2K1 variants to dabrafenib and trametinib using the MANO method in A375 cells**

In relation to Figure 4B, the relative viability of treated cells with trametinib and dabrafenib (1 nM to 10,000 nM).


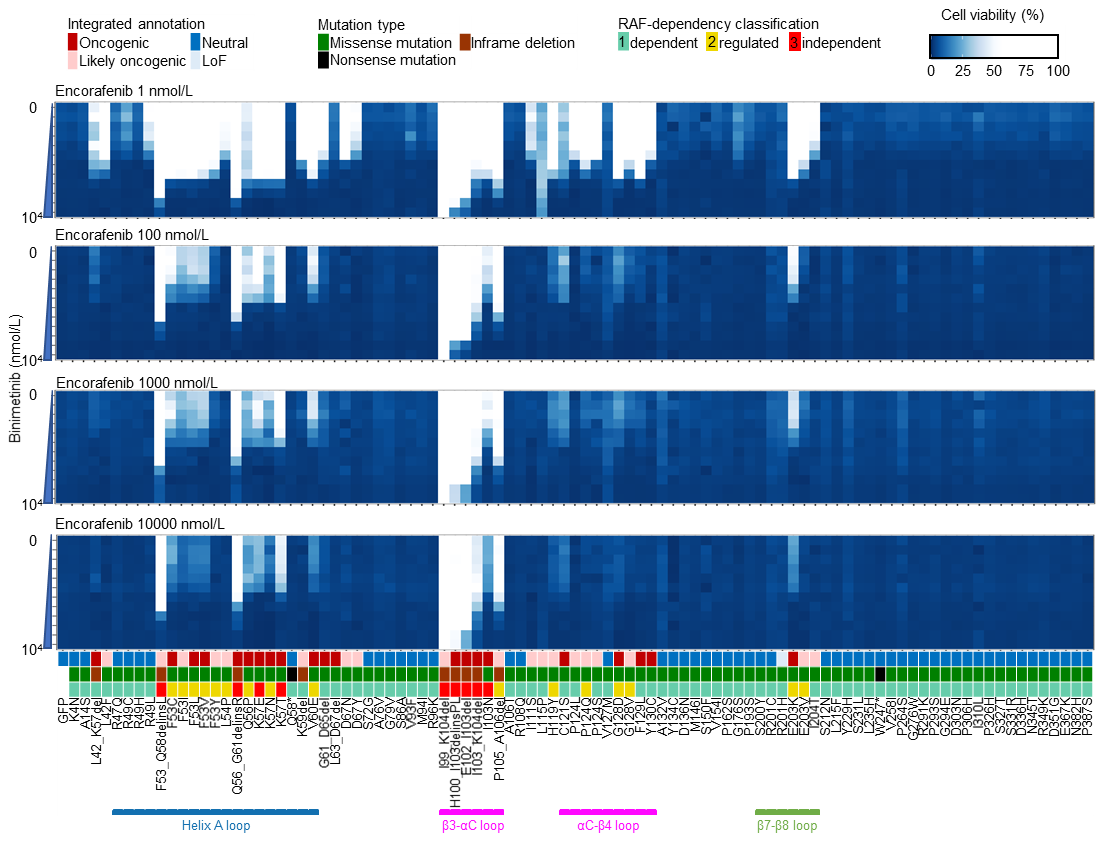


**Supplementary Figure S15: The sensitivity of MAP2K1 variants to encorafenib and binimetinib using the MANO method in A375 cells.**

In relation to Figure 4C, the relative viability of treated cells with binimetinib and encorafenib (1 nM to 10,000 nM).


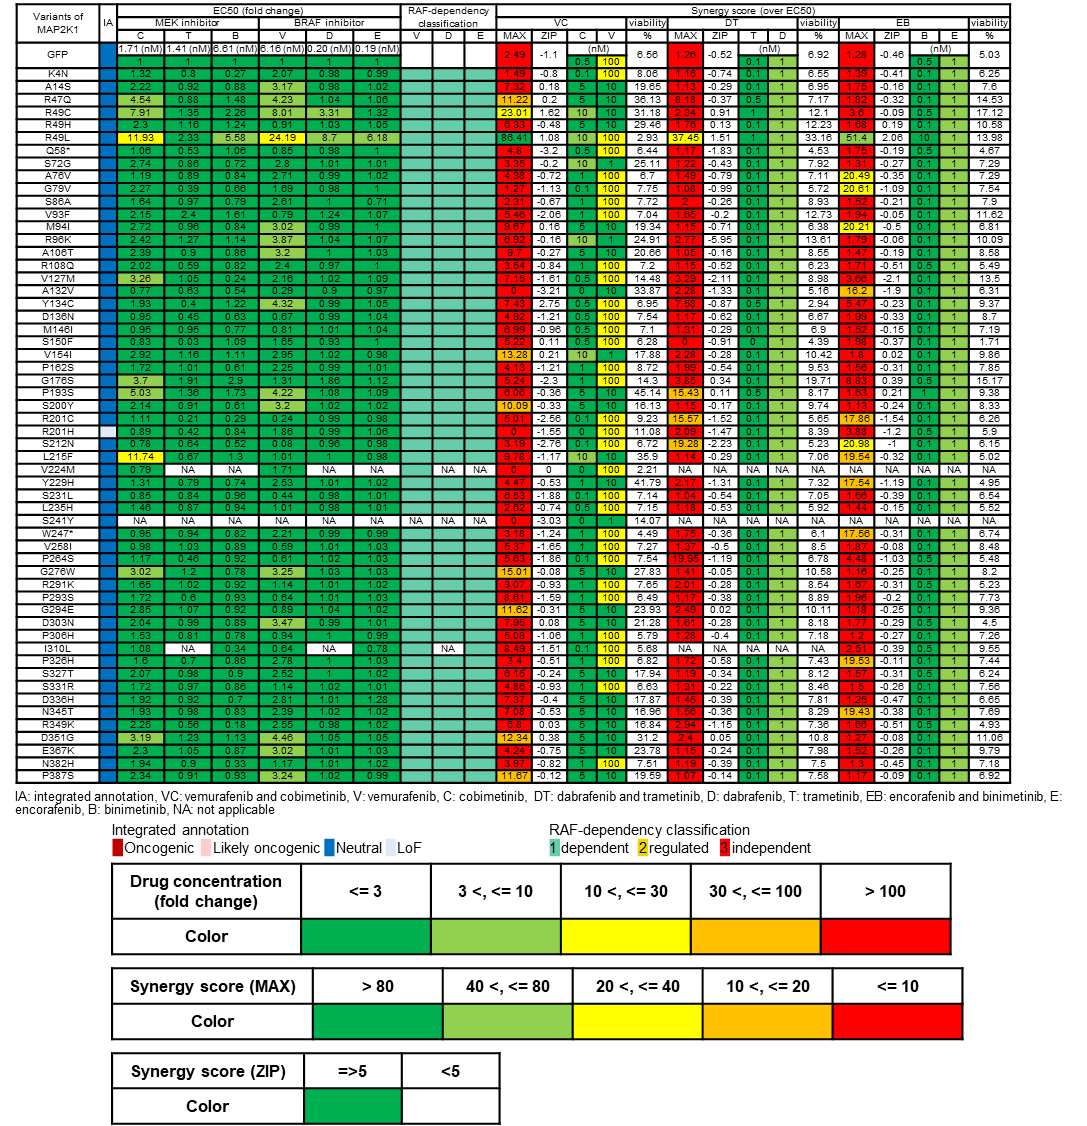


**Supplementary Figure S16: Assessment of drug sensitivity and synergy for other MAP2K1 variants.**

The drug sensitivities of the indicated non-functional MAP2K1 variants mutants were categorized into five levels; ≤3 (green), >3, ≤10 (yellow-green), >10, ≤30 (yellow), >30, ≤100 (orange) and >100 (red) based on the fold-change (to GFP) of the IC50 value for each drug against each mutant. The maximum synergistic effect among the combinations of concentrations above the IC50 was calculated and concentrations of the BRAF and MEK inhibitors in this case shown on the right side were categorized into five levels; >80 (green), >40, ≤80 (yellow-green), >20, ≤40 (yellow), >10, ≤20 (orange), and ≤10 (red). The concentration of the drug in each case is displayed (nM) and colored based on the fold-change of the IC50 value for GFP. The mean of the synergy effect is shown in the ZIP, where ≥5 (green) is defined as having a synergistic effect. C: vemurafenib and cobimetinib, V: vemurafenib, C: cobimetinib, DT: dabrafenib and trametinib, D: dabrafenib, T: trametinib, EB: encorafenib and binimetinib, E: encorafenib, B: binimetinib, NA: not applicable

**
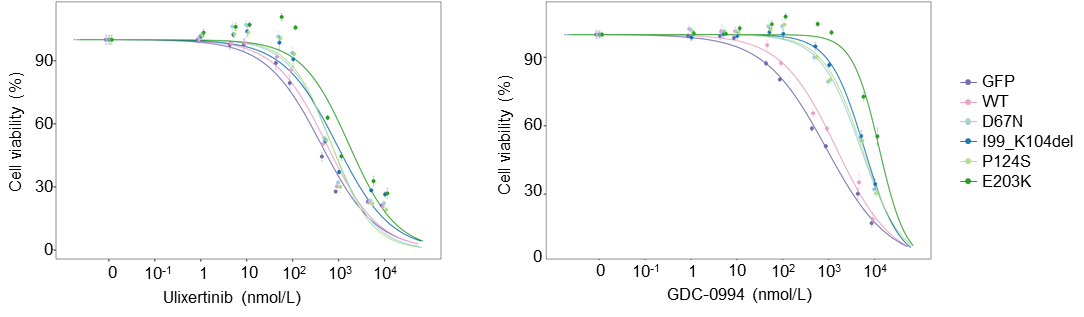
**

**Supplementary Figure S17: The individual sensitivity of MAP2K1 variants to combination treatment with ERK inhibitors in A375 cells**

A375 cells transduced with 4 MAP2K1 variants, wild-type, and GFP were treated with DMSO, ERK inhibitor (ulixertinib and GDC-0994) at the indicated concentrations for 5 days. Cell viability was measured using the PrestoBlue cell viability assay. The relative viability of the treated cells was measured compared with drug-free treatment. Data are plotted as the mean ± SD (n = 3).
